# Supplementary material
Source: publisher site journal article supplement (https://www.dovepress.com/article/supplementary_file/536692/Supplemental%20Tables.docx)
Supplement: Supplementary file 1 [file Supplemental%20Tables.docx]

**Supplemental Tables**

Supplemental Table 1: Multiple Family Group (MFG) Sessions

| **No** | **Session** | **Timeline** |
| --- | --- | --- |
| 1 | Introduction to Amaka Amasanyufu | Bi-weekly |
| 2 | Behavioral Health Knowledge, Stigma and Discrimination | Bi-weekly |
| 3 | Puberty, HIV and STDs Knowledge and Prevention | Bi-weekly |
| 4 | Building on Family Strength | Bi-weekly |
| 5 | Rules for Home and Problem Solving for Broken Rules | Bi-weekly |
| 6 | Respectful Communication | Bi-weekly |
| 7 | Responsibilities at Home | Bi-weekly |
| 8 | Family Relationships | Bi-weekly |
| 9 | Dealing with Stress in Families | Bi-weekly |
| 10 | Dealing with Evironmental Stressors | Bi-weekly |
| 11 | Who can we turn to? Building Support | Bi-weekly |
| 12 | Good Family Practices | Bi-weekly |
| 13 | Building Families Up | Bi-weekly |
| 14 | Everyone Does their Share to Solve Problems | Bi-weekly |
| 15 | Everyone gets a Chance to be Heard | Bi-weekly |
| 16 | Group Review and Ending Celebrations | Bi-weekly |

Supplemental Table 2: Financial Literacy Training (FLT) Sessions

| **No** | **Session** | **Timeline** |
| --- | --- | --- |
| 1 | Overview of Financial literacy and Budgeting | Bi-weekly |
| 2 | Savings, Asset Building and Asset accumulation | Bi-weekly |
| 3 | Bank Services | Bi-weekly |
| 4 | Debt Management | Bi-weekly |
